# Supplementary material for: Freeze-thaw decellularization of the trabecular meshwork in an ex vivo eye perfusion model
Source: PeerJ. 2017 Aug 14;5:e3629. doi: 10.7717/peerj.3629 (PMC5560227; doi:10.7717/peerj.3629)
Supplement: Supplemental Information 2 — Data used to generate main graph. [file peerj-05-3629-s002.xlsx]

## Sheet: Sheet1
hours	saponin	control	freeze-thaw	S sd	C sd	F sd	S sem	C sem	f sem
12	11.7	15.23	10.55	3.7	4.2	2	1.5	0.5	1.3
24	11.25	15.56	9.59	3.8	4.2	1.9	1.5	0.6	1.1
36	10.57	15.59	10.74	3.6	4.3	2.9	1.4	0.6	0.9
48	10.29	15.81	11.39	3.5	4.3	3.2	1.4	0.6	0.8
60	10.15	16.04	11.28	3.5	4.2	3.4	1.4	0.7	0.9
72	10.24	16.12	10.29	3.2	3.9	3.7	1.3	0.7	1.1
84	10.13	16.09	9.98	2.8	3.2	3.1	1.1	0.8	1
96	9.91	16.09	11.27	2.7	3.5	3.5	1.1	0.6	0.8
108	9.97	15.8	11.07	3.2	3.5	3.3	1.3	0.9	1
120	10.13	16.59	8.82	3.4	4.5	4.1	1.4	1.1	1.9
132	10.42	16.39	9.94	3.6	4	3.7	1.5	0.6	2
144	10.6	16.57	10.58	3.8	4.6	4	1.6	0.3	2.1
156	10.64	16.52	10.66	3.5	4.3	4.2	1.4	0.5	2.1
168	10.67	16.65	7.08	3.6	4.6	4.9	1.5	0.9	4
180	10.88	16.09	6.59	3.9	4.8	4.3	1.6	0.7	3.8
